# Supplementary material for: Response surface methodology for the mixed fungal fermentation of Codonopsis pilosula straw using Trichoderma reesei and Coprinus comatus
Source: PeerJ. 2023 Aug 14;11:e15757. doi: 10.7717/peerj.15757 (PMC10434135; doi:10.7717/peerj.15757)
Supplement: Supplemental Information 1 [file peerj-11-15757-s001.xlsx]

## Sheet: Sheet1
Items	Repetitions			mean value±SD
	1	2	3
Dry matter	924.5	897.4	895.2	905.7±16.32
Crude ash	68.3	71.6	72.5	70.8±2.21
Ether extract	49.4	48.2	47.6	48.4±0.92
Crude protein	150.7	156.9	156.8	154.8±3.55
Acid detergent fiber	548.5	532.6	544.3	541.8±8.24
Neutral detergent fiber	728.4	741.6	746.1	738.7±9.20
Cellulose	404.8	426.5	421.5	417.6±11.36
Lignin	108.7	122.7	112.4	114.6±7.25
