# Supplementary material for: Response surface methodology for the mixed fungal fermentation of Codonopsis pilosula straw using Trichoderma reesei and Coprinus comatus
Source: PeerJ. 2023 Aug 14;11:e15757. doi: 10.7717/peerj.15757 (PMC10434135; doi:10.7717/peerj.15757)
Supplement: Supplemental Information 13 [file peerj-11-15757-s013.xlsx]

## Sheet: Sheet1
Effects of different fungus ratios on degradation of cellulose and lignin in Codonopsis pilosula straw
Trichoderma reesei ： Coprinus comatus	acid detergent fiber	neutral detergent fiber	cellulose	lignin	Cellulose degradation rate	Lignin degradation rate
1（10:0）	51.91	71.47	39.7	11.17	0.0492536	0.0250218	41.7567	11.4567
	51.83	71.74	39.65	11.23	0.050451	0.0197847	41.7567	11.4567
	51.77	71.87	39.53	11.27	0.0533248	0.0162933	41.7567	11.4567
2（7:3）	50.86	70.53	38.44	11.19	0.0794284	0.0232761	41.7567	11.4567
	50.12	70.43	38.41	11.12	0.0801469	0.0293861	41.7567	11.4567
	50.23	70.95	38.34	11.11	0.0818233	0.0302589	41.7567	11.4567
3（5:5）	49.53	69.14	37.36	11.06	0.105293	0.0346232	41.7567	11.4567
	49.43	69.32	37.48	11.06	0.102419	0.0346232	41.7567	11.4567
	49.38	69.93	37.34	10.94	0.105772	0.0450975	41.7567	11.4567
4（3:7）	48.46	68.11	36.91	10.84	0.116069	0.053826	41.7567	11.4567
	48.35	67.87	36.38	10.74	0.128762	0.0625546	41.7567	11.4567
	48.39	68.16	36.57	10.82	0.124212	0.0555717	41.7567	11.4567
5（0:10）	49.98	70.03	38.11	10.93	0.0873314	0.0459703	41.7567	11.4567
	49.21	69.76	38.27	11.15	0.0834996	0.0267675	41.7567	11.4567
	49.15	69.12	38.47	11.03	0.07871	0.0372418	41.7567	11.4567
CK	54.49	73.64	41.88	11.77
	53.79	74.11	41.42	11.45
	54.25	73.85	41.97	11.15
mean value			41.7567	11.4567
