# Supplementary material for: Response surface methodology for the mixed fungal fermentation of Codonopsis pilosula straw using Trichoderma reesei and Coprinus comatus
Source: PeerJ. 2023 Aug 14;11:e15757. doi: 10.7717/peerj.15757 (PMC10434135; doi:10.7717/peerj.15757)
Supplement: Supplemental Information 14 [file peerj-11-15757-s014.xlsx]

## Sheet: Sheet1
Effects of different inoculation amount on degradation of cellulose and lignin in Codonopsis pilosula straw
inoculation amount	acid detergent fiber	neutral detergent fiber	cellulose	lignin	Cellulose degradation rate	Lignin degradation rate
1（5%）	48.91	68.78	37.23	10.76	0.108406	0.0608088	41.7567	11.4567
	48.73	68.82	36.86	10.99	0.117267	0.0407332	41.7567	11.4567
	48.84	68.69	37.02	10.88	0.113435	0.0503346	41.7567	11.4567
2（10%）	48.23	68.16	36.19	10.45	0.133312	0.0878673	41.7567	11.4567
	48.35	68.24	36.28	10.54	0.131157	0.0800116	41.7567	11.4567
	48.13	68.37	36.24	10.48	0.132115	0.0852488	41.7567	11.4567
3（15%）	48.95	68.54	37.31	10.8	0.10649	0.0573174	41.7567	11.4567
	48.62	68.43	36.89	10.67	0.116548	0.0686645	41.7567	11.4567
	48.77	68.38	37.18	10.72	0.109603	0.0643003	41.7567	11.4567
4（20%）	49.02	68.55	37.3	10.71	0.106729	0.0651731	41.7567	11.4567
	48.93	68.46	37.25	10.73	0.107927	0.0634274	41.7567	11.4567
	49.33	68.41	37.7	10.64	0.0971502	0.0712831	41.7567	11.4567
CK	54.49	73.64	41.88	11.77
	53.79	74.11	41.42	11.45
	54.25	73.85	41.97	11.15
