# Supplementary material for: Response surface methodology for the mixed fungal fermentation of Codonopsis pilosula straw using Trichoderma reesei and Coprinus comatus
Source: PeerJ. 2023 Aug 14;11:e15757. doi: 10.7717/peerj.15757 (PMC10434135; doi:10.7717/peerj.15757)
Supplement: Supplemental Information 15 [file peerj-11-15757-s015.xlsx]

## Sheet: Sheet1
Effects of different corn flour addition on degradation of cellulose and lignin in Codonopsis pilosula straw
corn flour addition	acid detergent fiber	neutral detergent fiber	cellulose	lignin	Cellulose degradation rate	Lignin degradation rate
1（5%）	48.75	68.64	37.12	10.77	0.11104	0.059936	41.7567	11.4567
	48.65	68.72	36.97	10.88	0.114632	0.0503346	41.7567	11.4567
	48.71	68.67	37.37	10.72	0.105053	0.0643003	41.7567	11.4567
2（10%）	48.14	68.06	36.31	10.25	0.130438	0.105324	41.7567	11.4567
	48.08	67.94	36.14	10.34	0.134509	0.0974687	41.7567	11.4567
	48.02	68.08	36.16	10.18	0.13403	0.111434	41.7567	11.4567
3（15%）	48.38	68.34	36.65	10.61	0.122296	0.0739017	41.7567	11.4567
	48.42	68.53	36.78	10.54	0.119183	0.0800116	41.7567	11.4567
	48.37	68.47	36.75	10.59	0.119901	0.0756474	41.7567	11.4567
4（20%）	48.82	68.63	36.55	10.65	0.124691	0.0704102	41.7567	11.4567
	48.73	68.56	36.47	10.56	0.126607	0.0782659	41.7567	11.4567
	49.03	68.48	36.49	10.62	0.126128	0.0730288	41.7567	11.4567
CK	54.49	73.64	41.88	11.77
	53.79	74.11	41.42	11.45
	54.25	73.85	41.97	11.15
