# Supplementary material for: Response surface methodology for the mixed fungal fermentation of Codonopsis pilosula straw using Trichoderma reesei and Coprinus comatus
Source: PeerJ. 2023 Aug 14;11:e15757. doi: 10.7717/peerj.15757 (PMC10434135; doi:10.7717/peerj.15757)
Supplement: Supplemental Information 18 [file peerj-11-15757-s018.xlsx]

## Sheet: Sheet1
Items	Repetitions			mean value±SD
	1	2	3
Dry matter	321.4	343.8	338.9	334.7±11.76
Crude ash	74.5	70.1	72.6	72.4±2.21
Ether extract	63.5	61.9	65.7	63.7±1.91
Crude protein	152.1	153.4	155.3	153.6±1.61
Acid detergent fiber	467.8	476.2	475.9	473.3±4.77
Neutral detergent fiber	677.3	685.2	688.9	683.8±5.93
Cellulose	369.6	354.8	356.5	360.6±8.10
Lignin	98.5	105.7	102.7	102.3±3.62
